# Supplementary material
Source: PubMed Central journal article supplement (PMC4573639)
Supplement: NIHMS588538-supplement-Supplementary_Materials.pdf [file NIHMS588538-supplement-Supplementary_Materials.pdf]

# Supplementary Material for “Regularization Methods for High-Dimensional Instrumental Variables Regression With an Application to Genetical Genomics”

## Proof of Theorem 4

We first present two lemmas that are essential to the proof of Theorem 4, which concern the concentration of the empirical covariance matrix  $\widehat{\mathbf{C}}$  around its population version  $\mathbf{C}$  and the score vector

$$\frac{1}{n}\widehat{\mathbf{X}}^T(\mathbf{y} - \widehat{\mathbf{X}}\boldsymbol{\beta}_0) = \frac{1}{n}\widehat{\mathbf{X}}^T\boldsymbol{\eta} - \frac{1}{n}\widehat{\mathbf{X}}^T(\widehat{\mathbf{X}} - \mathbf{X})\boldsymbol{\beta}_0$$

around zero. These lemmas can be viewed as generalizations of Lemma A.3 and inequality (A.15), respectively. For ease of presentation, we condition on the event of probability  $1 - \pi_0$  that the two error bounds in Condition (C4) hold, and incorporate the probability  $\pi_0$  into the result by the union bound.

**Lemma S.1.** *Under Conditions (C4)–(C6), if  $\mu_0 > 0$  and the first-stage error bounds  $e_1$  and  $e_2$  satisfy*

$$s(2Le_1 + e_2) \leq \frac{\alpha}{(4 - \alpha)\varphi} \wedge \frac{(\mu_0/2)^2}{s}, \quad (\text{S.1})$$

*then with probability at least  $1 - \pi_0$ , the following inequalities holds:*

$$\|(\widehat{\mathbf{C}}_{SS})^{-1}\|_\infty \leq \frac{4 - \alpha}{2(2 - \alpha)}\varphi, \quad (\text{S.2})$$

$$\|\widehat{\mathbf{C}}_{S^cS}(\widehat{\mathbf{C}}_{SS})^{-1}\|_\infty \leq \left\{ \left(1 - \frac{\alpha}{2}\right) \frac{\rho'(0+)}{\rho'_\mu(b_0/2)} \right\} \wedge (2cn^\nu), \quad (\text{S.3})$$

and

$$\Lambda_{\min}(\widehat{\mathbf{C}}_{SS}) > \mu\tau_0. \quad (\text{S.4})$$

*Proof.* It follows from the arguments in the proof of Lemma A.1 and Condition (C4) that

$$\max_{1 \leq i, j \leq p} \frac{1}{n} |\widehat{\mathbf{x}}_i^T \widehat{\mathbf{x}}_j - (\mathbf{Z}\boldsymbol{\gamma}_{0i})^T \mathbf{Z}\boldsymbol{\gamma}_{0j}| \leq 2Le_1 + e_2.$$

Consequently, by the assumption (S.1),

$$\varphi \|\widehat{\mathbf{C}}_{SS} - \mathbf{C}_{SS}\|_\infty \leq \varphi s(2Le_1 + e_2) \leq \frac{\alpha}{4 - \alpha} \quad (\text{S.5})$$

and

$$\varphi \|\widehat{\mathbf{C}}_{S^cS} - \mathbf{C}_{S^cS}\|_\infty \leq \frac{\alpha}{4 - \alpha}. \quad (\text{S.6})$$

Then inequality (S.2) follows as in the proof of Lemma A.3.

To show inequality (S.3), by (S.2), (S.5), (S.6), and Condition (C6), we have

$$\begin{aligned} & \|\widehat{\mathbf{C}}_{S^cS}(\widehat{\mathbf{C}}_{SS})^{-1} - \mathbf{C}_{S^cS}(\mathbf{C}_{SS})^{-1}\|_\infty \\ & \leq \|\widehat{\mathbf{C}}_{S^cS} - \mathbf{C}_{S^cS}\|_\infty \|(\widehat{\mathbf{C}}_{SS})^{-1}\|_\infty + \|\mathbf{C}_{S^cS}(\mathbf{C}_{SS})^{-1}\|_\infty \|\widehat{\mathbf{C}}_{SS} - \mathbf{C}_{SS}\|_\infty \|(\widehat{\mathbf{C}}_{SS})^{-1}\|_\infty \\ & \leq \frac{\alpha}{(4 - \alpha)\varphi} \frac{4 - \alpha}{2(2 - \alpha)} \varphi + \left[ \left\{ (1 - \alpha) \frac{\rho'(0+)}{\rho'_\mu(b_0/2)} \right\} \wedge (cn^\nu) \right] \frac{\alpha}{(4 - \alpha)\varphi} \frac{4 - \alpha}{2(2 - \alpha)} \varphi \\ & \leq \frac{\alpha}{2(2 - \alpha)} + \left\{ \frac{\alpha(1 - \alpha)}{2(2 - \alpha)} \frac{\rho'(0+)}{\rho'_\mu(b_0/2)} \right\} \wedge \left( \frac{c}{2} n^\nu \right) \\ & \leq \left\{ \frac{\alpha}{2} \frac{\rho'(0+)}{\rho'_\mu(b_0/2)} \right\} \wedge (cn^\nu), \end{aligned}$$

where we have used the inequalities  $\rho'(0+)/\rho'_\mu(b_0/2) \geq 1$  and  $\alpha/\{2(2 - \alpha)\} \leq 1/2 \leq cn^\nu/2$ . This, along with Condition (C6), implies (S.3).

Finally, it follows from the Hoffman–Wielandt inequality (Horn and Johnson 1985) and the assumption (S.1) that

$$|\Lambda_{\min}(\widehat{\mathbf{C}}_{SS}) - \Lambda_{\min}(\mathbf{C}_{SS})|^2 \leq \|\widehat{\mathbf{C}}_{SS} - \mathbf{C}_{SS}\|_F^2 \leq s^2(2Le_1 + e_2) \leq \left(\frac{\mu_0}{2}\right)^2.$$

In view of the definition of  $\mu_0$ , inequality (S.4) follows. This completes the proof of the lemma.

**Lemma S.2.** *Under Conditions (C4)–(C6), if the first-stage error bounds satisfy  $e_1 = O(1)$  and  $e_2 = O(1)$ , then there exist constants  $c_0, c_1, c_2 > 0$  such that, if we choose*

$$\mu \geq C_0 n^\nu \sqrt{\frac{\log p + \log q}{n}} \vee e_2,$$

where  $C_0 = c_0 L \max(\sigma_{p+1}, M\sigma_{\max}, M)$ , then with probability at least  $1 - \pi_0 - c_1(pq)^{-c_2}$ , it holds that

$$\left\| \frac{1}{n} \widehat{\mathbf{X}}^T \boldsymbol{\eta} - \frac{1}{n} \widehat{\mathbf{X}}^T (\widehat{\mathbf{X}} - \mathbf{X}) \boldsymbol{\beta}_0 \right\|_\infty < \frac{\alpha}{6cn^\nu} \mu \rho'(0+). \quad (\text{S.7})$$

*Proof.* As in the proof of Lemma A.2, we write  $n^{-1} \widehat{\mathbf{X}}^T \boldsymbol{\eta} - n^{-1} \widehat{\mathbf{X}}^T (\widehat{\mathbf{X}} - \mathbf{X}) \boldsymbol{\beta}_0 = T_1 + \dots + T_6$ . Letting  $t_0 = \alpha \mu \rho'(0+)/ (6cn^\nu)$ , we bound the six terms similarly as follows:

$$P \left( \|T_1\|_\infty \geq \frac{t_0}{6} \right) \leq P \left( \left\| \frac{1}{n} \mathbf{Z}^T \boldsymbol{\eta} \right\|_\infty \geq \frac{t_0}{6e_1} \right) \leq q \exp \left\{ -\frac{n}{2\sigma_{p+1}^2} \left( \frac{t_0}{6e_1} \right)^2 \right\},$$

$$\begin{aligned}
P\left(\|T_2\|_\infty \geq \frac{t_0}{6}\right) &\leq P\left(\left\|\frac{1}{n}\mathbf{Z}^T\boldsymbol{\eta}\right\|_\infty \geq \frac{t_0}{6L}\right) \leq q \exp\left\{-\frac{n}{2\sigma_{p+1}^2}\left(\frac{t_0}{6L}\right)^2\right\}, \\
P\left(\|T_3\|_\infty \geq \frac{t_0}{6}\right) &\leq P\left(\max_{1 \leq i \leq q, 1 \leq j \leq p} \left|\frac{1}{n}\mathbf{z}_i^T \boldsymbol{\varepsilon}_j\right| \geq \frac{t_0}{6Me_1}\right) \leq pq \exp\left\{-\frac{n}{2\sigma_{\max}^2}\left(\frac{t_0}{6Me_1}\right)^2\right\}, \\
P\left(\|T_4\|_\infty \geq \frac{t_0}{6}\right) &\leq P\left(\max_{1 \leq i \leq q, 1 \leq j \leq p} \left|\frac{1}{n}\mathbf{z}_i^T \boldsymbol{\varepsilon}_j\right| \geq \frac{t_0}{6LM}\right) \leq pq \exp\left\{-\frac{n}{2\sigma_{\max}^2}\left(\frac{t_0}{6LM}\right)^2\right\}, \\
\|T_5\|_\infty &\leq M \max_{1 \leq i, j \leq p} \frac{1}{n} \|\mathbf{Z}(\widehat{\boldsymbol{\gamma}}_i - \boldsymbol{\gamma}_{0i})\|_2 \|\mathbf{Z}(\widehat{\boldsymbol{\gamma}}_j - \boldsymbol{\gamma}_{0j})\|_2 \leq Me_2,
\end{aligned}$$

and

$$\|T_6\|_\infty \leq LM \max_{1 \leq j \leq p} \frac{1}{\sqrt{n}} \|\mathbf{Z}(\widehat{\boldsymbol{\gamma}}_j - \boldsymbol{\gamma}_{0j})\|_2 \leq LM\sqrt{e_2}.$$

Combining these bounds and in view of the assumptions  $e_1 = O(1)$  and  $e_2 = O(1)$ , there exist constants  $c_0, c_1, c_2 > 0$  such that, if we choose

$$\mu \geq C_0 n^\nu \sqrt{\frac{\log p + \log q}{n}} \vee e_2,$$

where  $C_0 = c_0 L \max(\sigma_{p+1}, M\sigma_{\max}, M)$ , then with probability at least  $1 - \pi_0 - c_1(pq)^{-c_2}$ , the desired inequality holds. This completes the proof of the lemma.

*Proof of Theorem 4.* One can easily show that  $\widehat{\boldsymbol{\beta}} \in \mathbb{R}^p$  is a strict local minimizer of problem (4) if the following conditions hold:

$$\frac{1}{n} \widehat{\mathbf{X}}_{\widehat{S}}^T (\mathbf{y} - \widehat{\mathbf{X}} \widehat{\boldsymbol{\beta}}) = \mu \rho'_\mu(|\widehat{\boldsymbol{\beta}}_{\widehat{S}}|) \circ \text{sgn}(\widehat{\boldsymbol{\beta}}_{\widehat{S}}), \quad (\text{S.8})$$

$$\left\| \frac{1}{n} \widehat{\mathbf{X}}_{\widehat{S}^c}^T (\mathbf{y} - \widehat{\mathbf{X}} \widehat{\boldsymbol{\beta}}) \right\|_\infty < \mu \rho'(0+), \quad (\text{S.9})$$

and

$$\Lambda_{\min}(\widehat{\mathbf{C}}_{\widehat{S}\widehat{S}}) > \mu \tau(\rho_\mu; \widehat{\boldsymbol{\beta}}_{\widehat{S}}), \quad (\text{S.10})$$

where  $\circ$  denotes the Hadamard (entrywise) product, and  $|\cdot|$ ,  $\rho'_\mu(\cdot)$ , and  $\text{sgn}(\cdot)$  are applied componentwise. It suffices to find a  $\widehat{\boldsymbol{\beta}} \in \mathbb{R}^p$  with the desired properties such that conditions (S.8)–(S.10) hold. Let  $\widehat{\boldsymbol{\beta}}_{S^c} = \mathbf{0}$ . The idea of the proof is to first determine  $\widehat{\boldsymbol{\beta}}_S$  from (S.8), and then show that thus obtained  $\widehat{\boldsymbol{\beta}}$  also satisfies (S.9) and (S.10).

From now on, we condition on the event of probability at least  $1 - \pi_0 - c_1(pq)^{-c_2}$  that the inequalities in Lemmas S.1 and S.2 hold. Using similar arguments to those in the proof of Theorem 3, (S.8) with  $\widehat{S}$  replaced by  $S$  can be written in the form

$$\widehat{\boldsymbol{\beta}}_S - \boldsymbol{\beta}_{0S} = (\widehat{\mathbf{C}}_{SS})^{-1} \left\{ \frac{1}{n} \widehat{\mathbf{X}}_S^T \boldsymbol{\eta} - \frac{1}{n} \widehat{\mathbf{X}}_S^T (\widehat{\mathbf{X}}_S - \mathbf{X}_S) \boldsymbol{\beta}_{0S} - \mu \rho'_\mu(|\widehat{\boldsymbol{\beta}}_S|) \circ \text{sgn}(\widehat{\boldsymbol{\beta}}_S) \right\}. \quad (\text{S.11})$$

Define the function  $f: \mathbb{R}^s \rightarrow \mathbb{R}^s$  by  $f(\boldsymbol{\theta}) = \boldsymbol{\beta}_{0S} + (\widehat{\mathbf{C}}_{SS})^{-1} \{n^{-1} \widehat{\mathbf{X}}_S^T \boldsymbol{\eta} - n^{-1} \widehat{\mathbf{X}}_S^T (\widehat{\mathbf{X}}_S - \mathbf{X}_S) \boldsymbol{\beta}_{0S} - \mu \rho'_\mu(|\boldsymbol{\theta}|) \circ \text{sgn}(\boldsymbol{\theta})\}$ , and let  $\mathcal{K}$  denote the hypercube  $\{\boldsymbol{\theta} \in \mathbb{R}^s: \|\boldsymbol{\theta} - \boldsymbol{\beta}_{0S}\|_\infty \leq 7\varphi\mu\rho'(0+)/4\}$ .

It follows from (S.2), (S.7), and Condition (C4) that, for  $\boldsymbol{\theta} \in \mathcal{K}$ ,

$$\begin{aligned} \|f(\boldsymbol{\theta}) - \boldsymbol{\beta}_{0S}\|_\infty &\leq \|(\widehat{\mathbf{C}}_{SS})^{-1}\|_\infty \left\{ \left\| \frac{1}{n} \widehat{\mathbf{X}}_S^T \boldsymbol{\eta} - \frac{1}{n} \widehat{\mathbf{X}}_S^T (\widehat{\mathbf{X}}_S - \mathbf{X}_S) \boldsymbol{\beta}_{0S} \right\|_\infty + \mu \rho'(0+) \right\} \\ &\leq \frac{4-\alpha}{2(2-\alpha)} \varphi \left\{ \frac{\alpha}{6cn^\nu} \mu \rho'(0+) + \mu \rho'(0+) \right\} \\ &\leq \frac{3}{2} \varphi \left\{ \frac{1}{6} \mu \rho'(0+) + \mu \rho'(0+) \right\} = \frac{7}{4} \varphi \mu \rho'(0+), \end{aligned}$$

that is,  $f(\mathcal{K}) \subset \mathcal{K}$ . Also, the last inequality and the assumption (14) imply that for  $\boldsymbol{\theta} \in \mathcal{K}$ ,  $\|\boldsymbol{\theta} - \boldsymbol{\beta}_{0S}\|_\infty \leq b_0/2$ , and hence  $\text{sgn}(\boldsymbol{\theta}) = \text{sgn}(\boldsymbol{\beta}_{0S})$ . Thus, in view of Condition (C4),  $f$  is a continuous function on the convex, compact hypercube  $\mathcal{K}$ . An application of Brouwer's fixed point theorem yields that equation (S.11) has a solution  $\widehat{\boldsymbol{\beta}}_S$  in  $\mathcal{K}$ . Moreover,  $\text{sgn}(\widehat{\boldsymbol{\beta}}_S) = \text{sgn}(\boldsymbol{\beta}_{0S})$ , so that  $\widehat{S} = S$ . Therefore, we have found a  $\widehat{\boldsymbol{\beta}}$  that satisfies the desired properties and (S.8).

To verify that  $\widehat{\boldsymbol{\beta}}$  satisfies (S.9), by substituting (S.11), we write

$$\begin{aligned} \frac{1}{n} \widehat{\mathbf{X}}_{S^c}^T (\mathbf{y} - \widehat{\mathbf{X}} \widehat{\boldsymbol{\beta}}) &= \frac{1}{n} \widehat{\mathbf{X}}_{S^c}^T \boldsymbol{\eta} - \frac{1}{n} \widehat{\mathbf{X}}_{S^c}^T (\widehat{\mathbf{X}}_S - \mathbf{X}_S) \boldsymbol{\beta}_{0S} \\ &\quad - \widehat{\mathbf{C}}_{S^c S} (\widehat{\mathbf{C}}_{SS})^{-1} \left\{ \frac{1}{n} \widehat{\mathbf{X}}_S^T \boldsymbol{\eta} - \frac{1}{n} \widehat{\mathbf{X}}_S^T (\widehat{\mathbf{X}}_S - \mathbf{X}_S) \boldsymbol{\beta}_{0S} - \mu \rho'_\mu(|\widehat{\boldsymbol{\beta}}_S|) \circ \text{sgn}(\widehat{\boldsymbol{\beta}}_S) \right\}. \end{aligned}$$

Also, we have  $\|\widehat{\boldsymbol{\beta}}_S\|_\infty = \|\widehat{\boldsymbol{\beta}}_{0S} + (\widehat{\boldsymbol{\beta}}_S - \boldsymbol{\beta}_{0S})\|_\infty \geq \|\widehat{\boldsymbol{\beta}}_{0S}\|_\infty - \|\widehat{\boldsymbol{\beta}}_S - \boldsymbol{\beta}_{0S}\|_\infty \geq b_0 - b_0/2 = b_0/2$ . This, together with (S.3), (S.7), and Condition (C4), leads to

$$\begin{aligned} \left\| \frac{1}{n} \widehat{\mathbf{X}}_{S^c}^T (\mathbf{y} - \widehat{\mathbf{X}} \boldsymbol{\beta}) \right\|_\infty &\leq \left\| \frac{1}{n} \widehat{\mathbf{X}}_{S^c}^T \boldsymbol{\eta} - \frac{1}{n} \widehat{\mathbf{X}}_{S^c}^T (\widehat{\mathbf{X}}_S - \mathbf{X}_S) \boldsymbol{\beta}_{0S} \right\|_\infty + \|\widehat{\mathbf{C}}_{S^c S} (\widehat{\mathbf{C}}_{SS})^{-1}\|_\infty \\ &\quad \times \left\{ \left\| \frac{1}{n} \widehat{\mathbf{X}}_S^T \boldsymbol{\eta} - \frac{1}{n} \widehat{\mathbf{X}}_S^T (\widehat{\mathbf{X}}_S - \mathbf{X}_S) \boldsymbol{\beta}_{0S} \right\|_\infty + \mu \rho'_\mu(b_0/2) \right\} \\ &< \frac{\alpha}{6cn^\nu} \mu \rho'(0+) + 2cn^\nu \cdot \frac{\alpha}{6cn^\nu} \mu \rho'(0+) + \left(1 - \frac{\alpha}{2}\right) \frac{\rho'(0+)}{\rho'_\mu(b_0/2)} \cdot \mu \rho'_\mu(b_0/2) \\ &\leq \frac{\alpha}{6} \mu \rho'(0+) + \frac{\alpha}{3} \mu \rho'(0+) + \left(1 - \frac{\alpha}{2}\right) \mu \rho'(0+) = \mu \rho'(0+). \end{aligned}$$

Finally, it follows from (S.4) and the definition of  $\tau_0$  that  $\Lambda_{\min}(\widehat{\mathbf{C}}_{SS}) > \mu \tau_0 \geq \mu \tau(\rho_\mu; \widehat{\boldsymbol{\beta}}_S)$ , which verifies (S.10) and completes the proof.
